# Supplementary material for: Prevalence, risk factors and metabolic profile of the non-obese and obese non-alcoholic fatty liver disease in a rural community of South Asia
Source: HighWire-hosted journal article supplement (doi:10.1136/bmjgast-2020-000535), 2020-12-01
Supplement: bmjgast-2020-000535supp001_data_supplement.pdf [file bmjgast-2020-000535supp001_data_supplement.pdf]

**Supplementary Table 1: Socio-demographic characteristics and metabolic profile among nonobese subjects with and without NAFLD.**

| Characteristics                      | Non-obese subjects (total=804) | Subjects without non-obese NAFLD (total=747) | Subjects with non-obese NAFLD (total=57) | p value |
|--------------------------------------|--------------------------------|----------------------------------------------|------------------------------------------|---------|
| Age                                  |                                |                                              |                                          | <0.001  |
| • less than 40                       | 414(51.5%)                     | 400 (53.50%)                                 | 14(24.6%)                                |         |
| • more than 40                       | 390(48.5%)                     | 347(46.5%)                                   | 43 (75.4%)                               |         |
| Sex-                                 |                                |                                              |                                          | 0.253   |
| • Male                               | 269(33.5%)                     | 246(32.9%)                                   | 23(40.3%)                                |         |
| • Female                             | 535(66.5%)                     | 501(67.1%)                                   | 34(59.6%)                                |         |
| Marital status                       |                                |                                              |                                          | 0.101   |
| • Married                            | 637(79.2%)                     | 587(78.6%)                                   | 50(87.7%)                                |         |
| • Single                             | 167(20.8%)                     | 160 (21.4%)                                  | 7 (12.3%)                                |         |
| Occupation                           |                                |                                              |                                          | 0.138   |
| • Housewife                          | 492(61.2%)                     | 464(62.1%)                                   | 28(49.1%)                                |         |
| • Cultivator and Day labor           | 87(10.8%)                      | 78(10.4%)                                    | 9 (15.8%)                                |         |
| • Service holders and others         | 225(28%)                       | 205(27.4%)                                   | 20(35.1%)                                |         |
| Family income (taka/month)           |                                |                                              |                                          | 0.061   |
| • Lower                              | 537(66.7%)                     | 505 (67.6%)                                  | 31(55.4%)                                |         |
| • Higher                             | 267(33.3%)                     | 242 (32.4%)                                  | 25(44.6%)                                |         |
| Education                            |                                |                                              |                                          | 0.462   |
| • Up to Class V                      | 418(52%)                       | 391(52.4%)                                   | 27(47.4%)                                |         |
| • More than class V                  | 385(47.9%)                     | 355(47.6%)                                   | 30(52.6%)                                |         |
| History of smoking (current or past) | 122(15.2%)                     | 114(15.3%)                                   | 8(14%)                                   | 0.801   |
| Religion                             |                                |                                              |                                          | 0.523   |
| • Muslim                             | 577(71.8%)                     | 534(71.5%)                                   | 43(75.4%)                                |         |
| • Hindu                              | 227(28.2%)                     | 213(28.5%)                                   | 14(24.6%)                                |         |
| Presence of MS                       | 184(22.9%)                     | 140(18.7%)                                   | 44(77.2%)                                | <0.001  |
| Presence of MS components            |                                |                                              |                                          | <0.001  |
| • Absent                             | 82(10.2%)                      | 81(10.8%)                                    | 1(1.8%)                                  |         |
| • One                                | 350(43.5%)                     | 344(46.1%)                                   | 6(10.5%)                                 |         |
| • Two                                | 188(23.4%)                     | 182(24.4%)                                   | 6(10.5%)                                 |         |
| • Three                              | 117(14.6%)                     | 98(13.1%)                                    | 19(33.3%)                                |         |
| • Four                               | 52(6.5%)                       | 35(4.7%)                                     | 17(29.8%)                                |         |
| • Five                               | 15(1.9%)                       | 7(0.9%)                                      | 8(14%)                                   |         |
| BMI kg/m <sup>2</sup> (mean ± SD)    | 20.97±2.55                     | 20.81±2.55                                   | 23.07±1.38                               | <0.001  |
| Presence of abdominal obesity        | 128(15.9%)                     | 98(13.1%)                                    | 30(52.6%)                                | <0.001  |
| Presence of DM                       | 57(7.1%)                       | 39(5.2%)                                     | 18(31.6%)                                | <0.001  |
| Presence of hypertension             | 145(18%)                       | 119(15.9%)                                   | 26(45.6%)                                |         |
| Presence of dyslipidemia             | 656(81.6%)                     | 601(80.5%)                                   | 55(96.5%)                                | 0.003   |
| ALT (>40U/L)                         | 45(5.6%)                       | 36(4.8%)                                     | 9 (15.8%)                                | 0.003   |

\*P-between subjects with and without NAFLD

**Abbreviations used:** BMI-body mass index, NAFLD-non-alcoholic fatty liver disease, DM-Diabetes Mellitus, MS-metabolic syndrome, ALT-Alanine Aminotransferase
